# Supplementary material for: Active Microbiota of Penaeus stylirostris Larvae: Partially Shaped via Vertical and Horizontal Transmissions and Larval Ontogeny
Source: MDPI journal article supplement (doi:10.3390/microorganisms12030608), 2024-03-19
Supplement: s1 [file s1]

**Figure S1.** Specific and core microbiotas of the larvae according to their larval stages.

A) Venn diagram of shared ASVs among the eggs and the nauplii collected on D0 and on D1. B) Venn diagram of shared ASVs among the nauplii collected on D0, on D1 and the zoea. C) Venn diagram of shared ASVs between the zoea and the mysis.

Colored ellipses correspond to group-specific ASVs of the larvae in: blue = egg, turquoise = nauplii collected on D0, light red = nauplii collected on D1, light green = zoea, orange = mysis. The overlapping area between all the ellipses, corresponds to the core microbiome. The numbers inside the ellipses and in the overlapping zones correspond to the total number of ASVs present in a given condition.

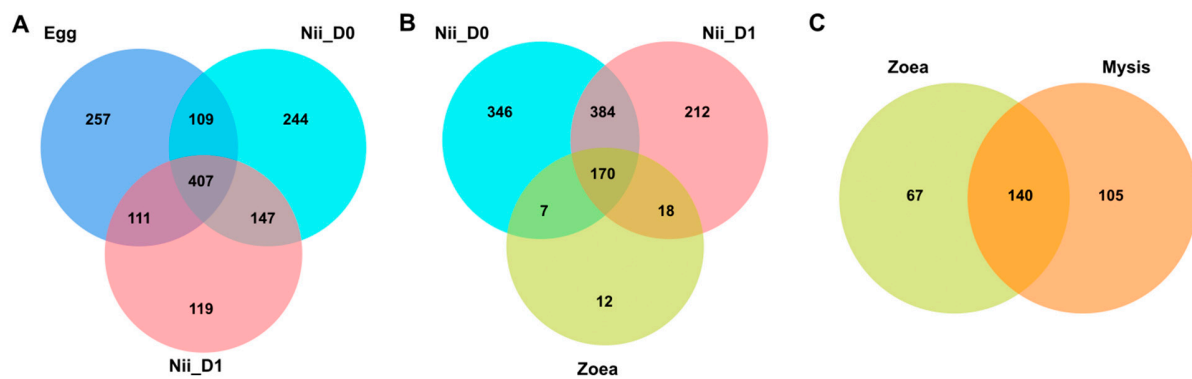

**Figure S2.** Differentially abundant ASV according to the larval stage.

LEfSe, linear discriminant analysis (LDA) effect size, exhibiting the ASVs significantly more abundant in the larvae according the larval stage.

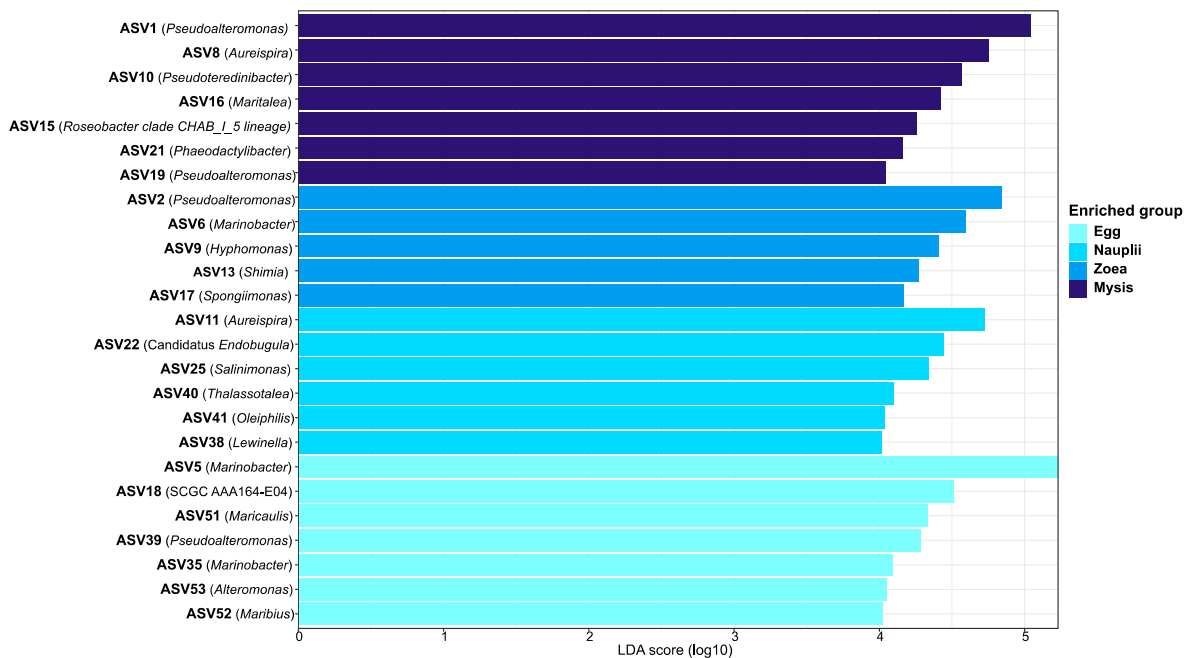

**Figure S3.** Relative abundance of the main putative ecological functions assigned with FAPROTAX to the specific microbiota of each larvae stage.

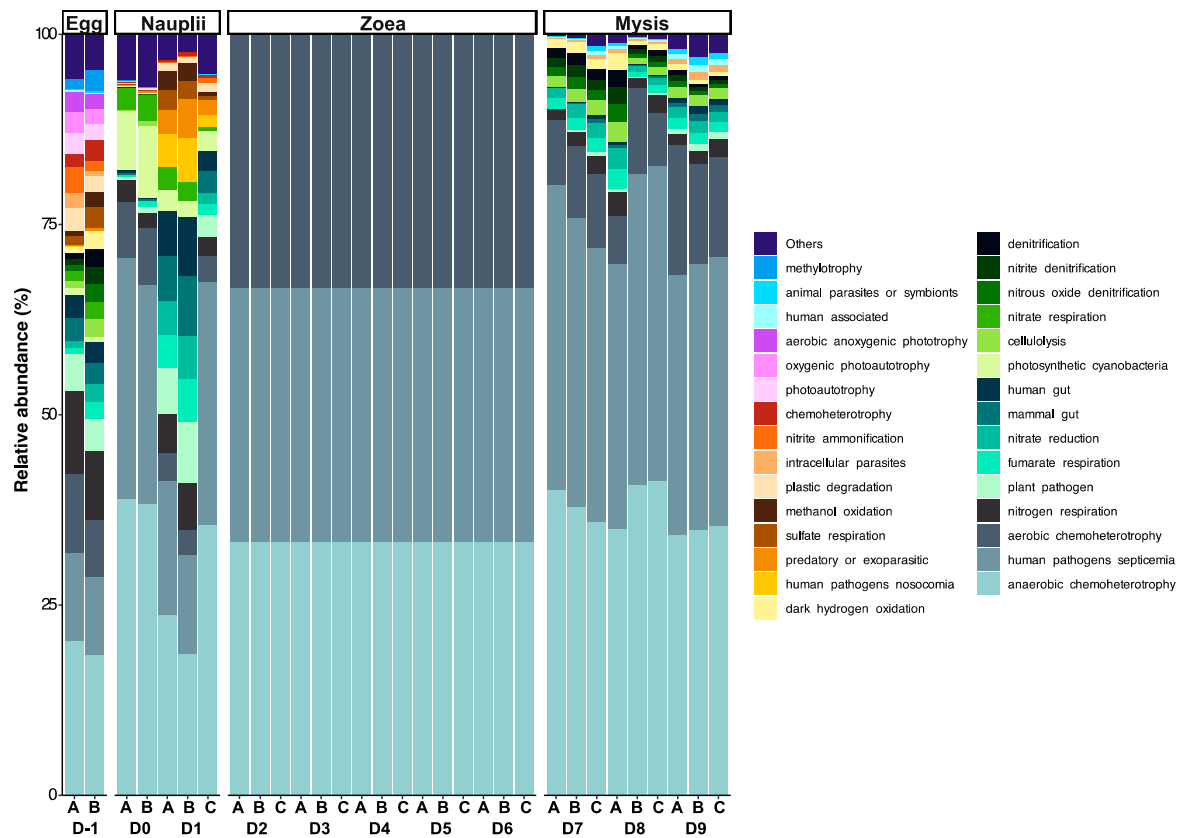

**Figure S4.** Relative abundance of the main putative ecological functions assigned with FAPROTAX to the core microbiota common to all larvae stages.

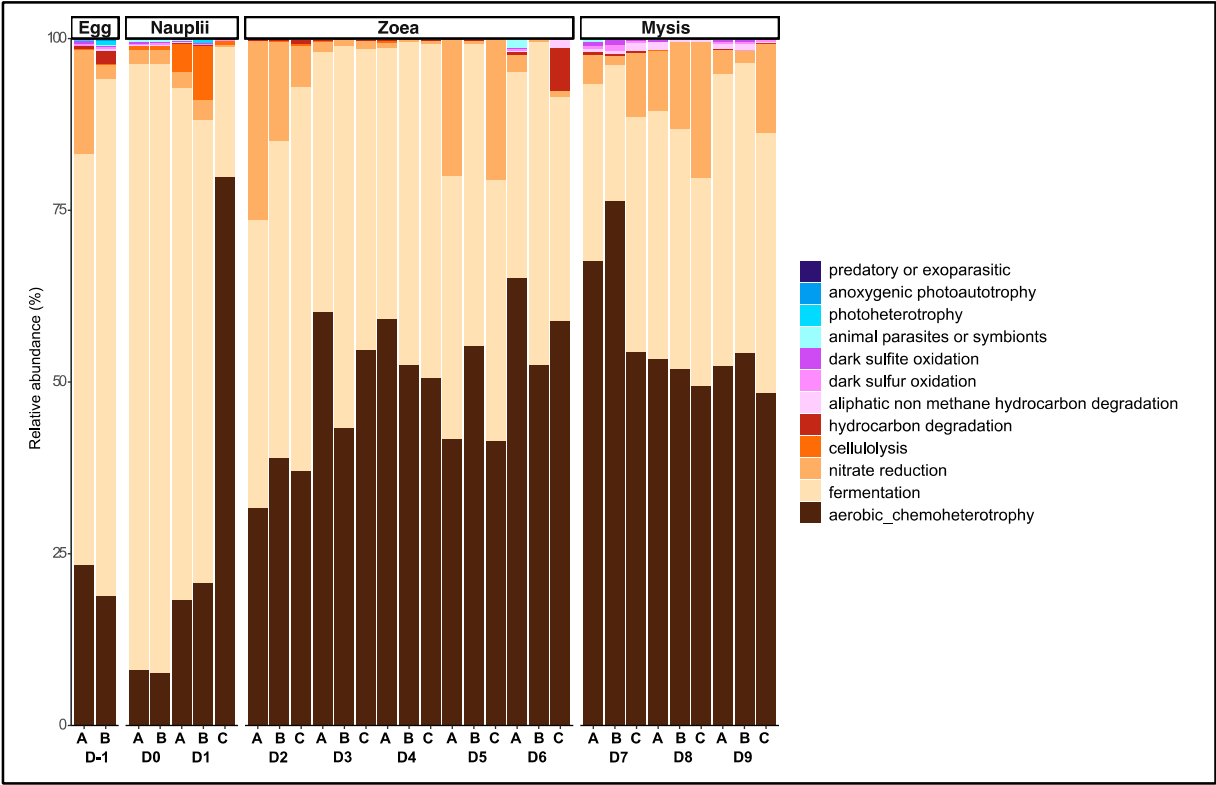

**Table S1.** Samples characterization and Alpha diversity indexes.

NA stands for non-applicable and PL for post-larvae

| <i>Sample</i>  | <i>Rearing day</i> | <i>Survial rate in %</i> | <i>Larval stage</i> | <i>Observed</i> | <i>ACE</i> | <i>Shannon</i> | <i>Inverse Simpson</i> | <i>good's coverage</i> |
|----------------|--------------------|--------------------------|---------------------|-----------------|------------|----------------|------------------------|------------------------|
| <i>Egg1</i>    | D_1                | 100                      | Egg                 | 1300            | 1569.64    | 3.77           | 15.06                  | 99.85                  |
| <i>Egg2</i>    | D_1                | 100                      | Egg                 | 1363            | 1446.68    | 3.65           | 8.13                   | 99.93                  |
| <i>Nii1_D0</i> | D0                 | 100                      | Nauplii             | 1143            | 1431.41    | 3.39           | 9.35                   | 99.90                  |
| <i>Nii2_D0</i> | D0                 | 100                      | Nauplii             | 1109            | 1374.37    | 3.39           | 9.28                   | 99.90                  |
| <i>L_D1_A</i>  | D1                 | 100                      | Nauplii             | 1294            | 1517.01    | 3.07           | 5.49                   | 99.94                  |
| <i>L_D1_B</i>  | D1                 | 92.4                     | Nauplii             | 1341            | 1525.12    | 3.48           | 7.66                   | 99.94                  |
| <i>L_D1_C</i>  | D1                 | 90.7                     | Nauplii             | 1133            | 1477.66    | 1.79           | 2.15                   | 99.93                  |
| <i>L_D2_A</i>  | D2                 | 100                      | Zoea                | 770             | 1084.31    | 2.59           | 6.67                   | 99.94                  |
| <i>L_D2_B</i>  | D2                 | 89.8                     | Zoea                | 728             | 1008.24    | 2.76           | 8.54                   | 99.92                  |
| <i>L_D2_C</i>  | D2                 | 96.9                     | Zoea                | 1023            | 1426.85    | 3.13           | 11.72                  | 99.93                  |
| <i>L_D3_A</i>  | D3                 | 96.3                     | Zoea                | 895             | 1232.34    | 3.11           | 13.13                  | 99.94                  |
| <i>L_D3_B</i>  | D3                 | 92.2                     | Zoea                | 696             | 972.50     | 2.82           | 9.13                   | 99.92                  |
| <i>L_D3_C</i>  | D3                 | 98                       | Zoea                | 976             | 1344.52    | 3.03           | 10.44                  | 99.92                  |
| <i>L_D4_A</i>  | D4                 | 87                       | Zoea                | 980             | 1267.76    | 3.01           | 10.08                  | 99.94                  |
| <i>L_D4_B</i>  | D4                 | 96.7                     | Zoea                | 870             | 1197.58    | 2.92           | 8.58                   | 99.91                  |
| <i>L_D4_C</i>  | D4                 | 109.1                    | Zoea                | 903             | 1154.27    | 3.21           | 13.73                  | 99.94                  |
| <i>L_D5_A</i>  | D5                 | 82.6                     | Zoea                | 857             | 1131.91    | 2.66           | 6.32                   | 99.92                  |
| <i>L_D5_B</i>  | D5                 | 87.4                     | Zoea                | 853             | 1066.89    | 3.11           | 11.72                  | 99.94                  |
| <i>L_D5_C</i>  | D5                 | 91.1                     | Zoea                | 594             | 772.98     | 2.19           | 3.94                   | 99.93                  |
| <i>L_D6_A</i>  | D6                 | 72.6                     | Zoea                | 797             | 926.16     | 3.20           | 12.95                  | 99.94                  |
| <i>L_D6_B</i>  | D6                 | 73.3                     | Zoea                | 734             | 967.68     | 1.39           | 1.75                   | 99.96                  |
| <i>L_D6_C</i>  | D6                 | 80.7                     | Zoea                | 1060            | 1252.09    | 3.42           | 15.42                  | 99.95                  |
| <i>L_D7_A</i>  | D7                 | 78.1                     | Mysis               | 734             | 906.73     | 3.42           | 16.10                  | 99.90                  |
| <i>L_D7_B</i>  | D7                 | 69.6                     | Mysis               | 532             | 643.99     | 3.44           | 18.33                  | 99.89                  |
| <i>L_D7_C</i>  | D7                 | 66.5                     | Mysis               | 698             | 834.17     | 3.32           | 14.29                  | 99.91                  |
| <i>L_D8_A</i>  | D8                 | 73.3                     | Mysis               | 848             | 1100.48    | 3.30           | 13.91                  | 99.90                  |
| <i>L_D8_B</i>  | D8                 | 72.8                     | Mysis               | 781             | 951.02     | 2.72           | 6.94                   | 99.93                  |
| <i>L_D8_C</i>  | D8                 | 73.3                     | Mysis               | 874             | 1057.82    | 2.68           | 6.54                   | 99.95                  |
| <i>L_D9_A</i>  | D9                 | 75.9                     | Mysis-PL            | 1061            | 1197.76    | 3.11           | 6.92                   | 99.96                  |
| <i>L_D9_B</i>  | D9                 | 70.9                     | Mysis-PL            | 1012            | 1112.43    | 3.07           | 7.23                   | 99.96                  |
| <i>L_D9_C</i>  | D8                 | 66.5                     | Mysis-PL            | 1144            | 1236.76    | 2.92           | 7.37                   | 99.97                  |
| <i>ResI</i>    | NA                 | NA                       | NA                  | 1391            | 1509.31    | 3.90           | 16.54                  | 99.88                  |
| <i>ResNT</i>   | NA                 | NA                       | NA                  | 1196            | 1513.62    | 2.74           | 5.22                   | 99.92                  |

ResT | NA NA NA 1062 1312.84 3.13 6.24 99.89

**Table S2.** Pairwise comparison (Dunn test) on the alpha diversity indexes according to the rearing day.

In bold, values indicate significant differences ( $P < 0.05$ ).

| Compared groups |    | Observed     | ACE          |
|-----------------|----|--------------|--------------|
| D_1             | D0 | 0,547        | 0,616        |
| D_1             | D1 | 0,769        | 0,971        |
| D_1             | D2 | <b>0,023</b> | 0,092        |
| D_1             | D3 | <b>0,030</b> | 0,124        |
| D_1             | D4 | 0,092        | 0,164        |
| D_1             | D5 | <b>0,011</b> | <b>0,017</b> |
| D_1             | D6 | <b>0,035</b> | <b>0,028</b> |
| D_1             | D7 | <b>0,002</b> | <b>0,002</b> |
| D_1             | D8 | <b>0,025</b> | <b>0,019</b> |
| D_1             | D9 | 0,359        | 0,133        |
| D0              | D1 | 0,714        | 0,557        |
| D0              | D2 | 0,107        | 0,256        |
| D0              | D3 | 0,133        | 0,322        |
| D0              | D4 | 0,305        | 0,399        |
| D0              | D5 | 0,061        | 0,067        |
| D0              | D6 | 0,147        | 0,099        |
| D0              | D7 | <b>0,015</b> | <b>0,010</b> |
| D0              | D8 | 0,115        | 0,072        |
| D0              | D9 | 0,797        | 0,340        |
| D1              | D2 | <b>0,027</b> | 0,054        |
| D1              | D3 | <b>0,037</b> | 0,078        |
| D1              | D4 | 0,119        | 0,110        |
| D1              | D5 | <b>0,012</b> | <b>0,007</b> |
| D1              | D6 | <b>0,042</b> | <b>0,012</b> |
| D1              | D7 | <b>0,002</b> | <b>0,000</b> |
| D1              | D8 | <b>0,030</b> | <b>0,008</b> |
| D1              | D9 | 0,486        | 0,085        |
| D2              | D3 | 0,902        | 0,870        |
| D2              | D4 | 0,512        | 0,743        |
| D2              | D5 | 0,774        | 0,436        |
| D2              | D6 | 0,854        | 0,566        |
| D2              | D7 | 0,356        | 0,110        |
| D2              | D8 | 0,967        | 0,461        |

|    |    |              |       |
|----|----|--------------|-------|
| D2 | D9 | 0,129        | 0,838 |
| D3 | D4 | 0,594        | 0,870 |
| D3 | D5 | 0,682        | 0,346 |
| D3 | D6 | 0,951        | 0,461 |
| D3 | D7 | 0,296        | 0,078 |
| D3 | D8 | 0,935        | 0,367 |
| D3 | D9 | 0,163        | 0,967 |
| D4 | D5 | 0,346        | 0,268 |
| D4 | D6 | 0,637        | 0,367 |
| D4 | D7 | 0,114        | 0,054 |
| D4 | D8 | 0,539        | 0,286 |
| D4 | D9 | 0,389        | 0,902 |
| D5 | D6 | 0,637        | 0,838 |
| D5 | D7 | 0,525        | 0,412 |
| D5 | D8 | 0,743        | 0,967 |
| D5 | D9 | 0,071        | 0,325 |
| D6 | D7 | 0,268        | 0,305 |
| D6 | D8 | 0,886        | 0,870 |
| D6 | D9 | 0,183        | 0,436 |
| D7 | D8 | 0,335        | 0,389 |
| D7 | D9 | <b>0,015</b> | 0,071 |
| D8 | D9 | 0,140        | 0,346 |
